# Supplementary material for: The Multienzyme Complex Nature of Dehydroepiandrosterone Sulfate Biosynthesis
Source: MDPI journal article supplement (doi:10.3390/ijms25042072), 2024-02-08
Supplement: s1 [file s1]

## **Multienzyme complex nature of dehydroepiandrosterone sulfate biosynthesis**

Tumilovich A. M., Yablokov E. O., Mezentsev Y. V.\*, Ershov P. V, Basina V. P.,  
Gnedenko O. V., Kaluzhskiy L. A., Tsybruk T. V., Grabovec I. P., Kisel M. S., Shabunya P. S.,  
Soloveva N. A., Vavilov N. E., Gilep A. A., Ivanov A. S.

Correspondence to: Mezentsev Y. V. [yu.mezentsev@gmail.com](mailto:yu.mezentsev@gmail.com)

Table S1. The list of articles used for text mining on any evidence of interactions (functional, co-expression, semantic, etc.) between cytochromes P450 and cytosolic sulfotransferases.

| <b>PMID</b> | <b>Title of article</b>                                                                                                                                  | <b>Year of publication</b> |
|-------------|----------------------------------------------------------------------------------------------------------------------------------------------------------|----------------------------|
| 33024080    | Alteration of the steroidogenesis in boys with autism spectrum disorders                                                                                 | 2020                       |
| 28752602    | Alterations in the steroid biosynthetic pathways in the human prefrontal cortex in mood disorders: A post-mortem study                                   | 2018                       |
| 30326245    | Local estrogen metabolism (intracrinology) in endometrial cancer: A systematic review                                                                    | 2019                       |
| 26940356    | Combined steroidogenic characters of fetal adrenal and Leydig cells in childhood adrenocortical carcinoma                                                | 2016                       |
| 20379884    | Examination of testicular gene expression patterns in Yorkshire pigs with high and low levels of boar taint                                              | 2010                       |
| 32590918    | Expression of Key Androgen-Activating Enzymes in Ovarian Steroid Cell Tumor, Not Otherwise Specified                                                     | 2020                       |
| 23197595    | Steroidogenic enzyme expression in the human fetal liver and potential role in the endocrinology of pregnancy                                            | 2013                       |
| 29248761    | Low-dose metformin exposure causes changes in expression of endocrine disruption-associated genes                                                        | 2018                       |
| 28690541    | The Significance of the Sulfatase Pathway for Local Estrogen Formation in Endometrial Cancer                                                             | 2017                       |
| 19551860    | Common germline polymorphisms in COMT, CYP19A1, ESR1, PGR, SULT1E1 and STS and survival after a diagnosis of breast cancer                               | 2009                       |
| 26704533    | Preliminary evidence of altered steroidogenesis in women with Alzheimer's disease: Have the patients "OLDER" adrenal zona reticularis?                   | 2016                       |
| 19776291    | Association of testicular germ cell tumor with polymorphisms in estrogen receptor and steroid metabolism genes                                           | 2010                       |
| 32346900    | Interleukin-6 increases adrenal androgen release by regulating the expression of steroidogenic proteins in NCI-H295R cells                               | 2020                       |
| 21251947    | Disrupting effects of bifenthrin on ovulatory gene expression and prostaglandin synthesis in rat ovarian granulosa cells                                 | 2011                       |
| 30981973    | Temporal expression pattern of steroid-metabolizing enzymes in bovine COC during in vitro maturation employing different gonadotropin concentrations     | 2019                       |
| 36296565    | Resveratrol Analogues as Selective Estrogen Signaling Pathway Modulators: Structure-Activity Relationship                                                | 2020                       |
| 25138635    | Corpora lutea of pregnant and pseudopregnant domestic cats reveal similar steroidogenic capacities during the luteal life span                           | 2014                       |
| 29196065    | Steroidogenic enzymes, their products and sex steroid receptors during testis development and spermatogenesis in the domestic cat ( <i>Felis catus</i> ) | 2018                       |
| 31849283    | Germline variants and response to systemic therapy in advanced prostate cancer                                                                           | 2020                       |
| 29588428    | SULFATION PATHWAYS: Expression of SULT2A1, SULT2B1 and HSD3B1 in the porcine testis and epididymis                                                       | 2018                       |

|          |                                                                                                                                                                                                              |      |
|----------|--------------------------------------------------------------------------------------------------------------------------------------------------------------------------------------------------------------|------|
| 28866654 | Hydroxylation and sulfation of sex steroid hormones in inflammatory liver                                                                                                                                    | 2017 |
| 33815270 | Androgen and Luteinizing Hormone Stimulate the Function of Rat Immature Leydig Cells Through Different Transcription Signals                                                                                 | 2021 |
| 26194504 | Is idiopathic hirsutism (IH) really idiopathic? mRNA expressions of skin steroidogenic enzymes in women with IH                                                                                              | 2015 |
| 27262986 | Impact of high-fat diet on liver genes expression profiles in mice model of nonalcoholic fatty liver disease                                                                                                 | 2016 |
| 30217785 | The sulfatase pathway as estrogen supply in endometrial cancer                                                                                                                                               | 2018 |
| 37468957 | Abnormal DNA methylation within genes of the steroidogenesis pathway two years after paediatric critical illness and association with stunted growth in height further in time                               | 2023 |
| 33421752 | Evaluation of testicular toxicity upon fetal exposure to bisphenol A using an organ culture method                                                                                                           | 2021 |
| 20100319 | Transcript profiling of candidate genes in testis of pigs exhibiting large differences in androstenone levels                                                                                                | 2010 |
| 30590593 | Characterization of Human Adrenal Steroidogenesis During Fetal Development                                                                                                                                   | 2019 |
| 27940297 | Increased levels of enzymes involved in local estradiol synthesis in chronic obstructive pulmonary disease                                                                                                   | 2017 |
| 36279747 | Unhatched bovine blastocysts express all transcripts of the estrogen biosynthetic pathway, but steroid hormone synthesis could not yet be demonstrated                                                       | 2023 |
| 33915228 | Targeted RNA sequencing of adrenal zones using immunohistochemistry-guided capture of formalin-fixed paraffin-embedded tissue                                                                                | 2021 |
| 37440461 | An integrated single-cell analysis of human adrenal cortex development                                                                                                                                       | 2023 |
| 24576611 | Development of adrenal cortical zonation and expression of key elements of adrenal androgen production in the chimpanzee ( <i>Pan troglodytes</i> ) from birth to adulthood                                  | 2014 |
| 18318428 | CYP1A1, SULT1A1, and SULT1E1 polymorphisms are risk factors for endometrial cancer susceptibility                                                                                                            | 2008 |
| 27854074 | Resveratrol and its methoxy derivatives modulate the expression of estrogen metabolism enzymes in breast epithelial cells by AhR down-regulation                                                             | 2017 |
| 17080404 | Steroidogenic gene expression in H295R cells and the human adrenal gland: adrenotoxic effects of lindane in vitro                                                                                            | 2006 |
| 18505908 | Analysis of mRNA expression for steroidogenic enzymes in the remaining adrenal cortices attached to adrenocortical adenomas                                                                                  | 2008 |
| 22542949 | Androgen metabolism and JAK/STAT pathway genes and prostate cancer risk                                                                                                                                      | 2012 |
| 21533175 | Eight common genetic variants associated with serum DHEAS levels suggest a key role in ageing mechanisms                                                                                                     | 2011 |
| 27085553 | Expression of steroidogenic enzymes and their transcription factors in cortisol-producing adrenocortical adenomas: immunohistochemical analysis and quantitative real-time polymerase chain reaction studies | 2016 |
| 19443782 | MAPK3/1 (ERK1/2) in ovarian granulosa cells are essential for female fertility                                                                                                                               | 2009 |

|          |                                                                                                                                                                                         |      |
|----------|-----------------------------------------------------------------------------------------------------------------------------------------------------------------------------------------|------|
| 22427816 | Knockdown of SF-1 and RNF31 Affects Components of Steroidogenesis, TGF $\beta$ , and Wnt/ $\beta$ -catenin Signaling in Adrenocortical Carcinoma Cells                                  | 2012 |
| 30995907 | Androgen receptor expression is required to ensure development of adult Leydig cells and to prevent development of steroidogenic cells with adrenal characteristics in the mouse testis | 2019 |
| 23913208 | Survival prediction based on inherited gene variation analysis                                                                                                                          | 2014 |
| 33024080 | Alteration of the steroidogenesis in boys with autism spectrum disorders                                                                                                                | 2020 |
| 24031161 | Comprehensive Assessment and Network Analysis of the Emerging Genetic Susceptibility Landscape of Prostate Cancer                                                                       | 2013 |
| 27623070 | Age-dependent Increases in Adrenal Cytochrome b5 and Serum 5-Androstenediol-3-sulfate                                                                                                   | 2016 |
| 23709748 | Low Systemic Testosterone Levels Induce Androgen Maintenance in Benign Rat Prostate Tissue                                                                                              | 2014 |
| 25543021 | Regulation of androgen biosynthesis - A short review and preliminary results from the hyperandrogenic starvation NCI-H295R cell model                                                   | 2015 |
| 22271526 | Adrenal androgen production in catarrhine primates and the evolution of adrenarche                                                                                                      | 2012 |
| 29392307 | Testosterone Pathway Genetic Polymorphisms in Relation to Primary Open-Angle Glaucoma: An Analysis in Two Large Datasets                                                                | 2018 |
| 24662082 | Rooibos flavonoids inhibit the activity of key adrenal steroidogenic enzymes, modulating steroid hormone levels in H295R cells                                                          | 2014 |
| 28459107 | A genomic atlas of human adrenal and gonad development                                                                                                                                  | 2017 |
| 24616772 | Benign adrenal adenomas secreting excess mineralocorticoids and glucocorticoids                                                                                                         | 2013 |
| 29228596 | CYP19A1 polymorphisms associated with coronary artery disease and circulating sex hormone levels in a Chinese population                                                                | 2017 |
| 23123734 | Estrogen-related receptor $\alpha$ in normal adrenal cortex and adrenocortical tumors: involvement in development and oncogenesis                                                       | 2013 |
| 25404712 | Autocrine androgen action is essential for Leydig cell maturation and function, and protects against late-onset Leydig cell apoptosis in both mice and men                              | 2014 |
| 34304130 | Yangonin modulates lipid homeostasis, ameliorates cholestasis and cellular senescence in alcoholic liver disease via activating nuclear receptor FXR                                    | 2021 |
| 28954628 | Transcriptome analysis reveals differences in mechanisms regulating cessation of luteal function in pregnant and non-pregnant dogs                                                      | 2017 |
| 32428001 | Sex-biased genetic programs in liver metabolism and liver fibrosis are controlled by EZH1 and EZH2                                                                                      | 2020 |
| 24223173 | Identification of estrogen target genes during zebrafish embryonic development through transcriptomic analysis                                                                          | 2013 |
| 20833731 | Ex3 $\alpha$ ERKO Male Infertility Phenotype Recapitulates the $\alpha$ ERKO Male Phenotype                                                                                             | 2010 |
| 26865584 | Adrenal-derived 11-Oxygenated 19-Carbon Steroids are the Dominant Androgens in Classic 21-Hydroxylase Deficiency                                                                        | 2016 |

|          |                                                                                                                                                                                                               |      |
|----------|---------------------------------------------------------------------------------------------------------------------------------------------------------------------------------------------------------------|------|
| 24281767 | Hypospadias and variants in genes related to sex hormone biosynthesis and metabolism                                                                                                                          | 2015 |
| 31357645 | Activation of Adrenal Steroidogenesis and an Improvement of Mood Balance in Postmenopausal Females after Spa Treatment Based on Physical Activity                                                             | 2019 |
| 37125608 | Primary Aldosteronism: Spatial Multiomics Mapping of Genotype-Dependent Heterogeneity and Tumor Expansion of Aldosterone-Producing Adenomas                                                                   | 2023 |
| 28939879 | Differential expression and co-expression gene networks reveal candidate biomarkers of boar taint in non-castrated pigs                                                                                       | 2017 |
| 18497089 | Gene expression of 17beta-estradiol-metabolizing isozymes: comparison of normal human mammary gland to normal human liver and to cultured human breast adenocarcinoma cells                                   | 2008 |
| 24011194 | Transcriptomic analysis of the porcine endometrium during early pregnancy and the estrous cycle                                                                                                               | 2013 |
| 21146967 | The suitability of rat hepatoma cell line H4IIE for evaluating the potentials of compounds to induce CYP3A23 expression                                                                                       | 2012 |
| 20887769 | Disturbed expression of phase I and phase II estrogen-metabolizing enzymes in endometrial cancer: lower levels of CYP1B1 and increased expression of S-COMT                                                   | 2011 |
| 16985250 | Estrogen sulfation genes, hormone replacement therapy, and endometrial cancer risk                                                                                                                            | 2006 |
| 17945481 | Regulation of the adrenal androgen biosynthesis                                                                                                                                                               | 2007 |
| 21828262 | Regulation of estrogen sulfotransferase expression by confluence of MCF10A breast epithelial cells: role of the aryl hydrocarbon receptor                                                                     | 2011 |
| 23277161 | Disturbed balance between phase I and II metabolizing enzymes in ovarian endometriosis: a source of excessive hydroxy-estrogens and ROS?                                                                      | 2013 |
| 19497978 | The mediator complex subunit 1 enhances transcription of genes needed for adrenal androgen production                                                                                                         | 2009 |
| 15681896 | Effects of NO-1886 (Ibrolipim), a lipoprotein lipase-promoting agent, on gene induction of cytochrome P450s, carboxylesterases, and sulfotransferases in primary cultures of human hepatocytes                | 2004 |
| 23685396 | 11 $\beta$ -hydroxyandrostenedione, the product of androstenedione metabolism in the adrenal, is metabolized in LNCaP cells by 5 $\alpha$ -reductase yielding 11 $\beta$ -hydroxy-5 $\alpha$ -androstenedione | 2013 |
| 17921479 | Estrogen metabolizing enzymes in endometrium and endometriosis                                                                                                                                                | 2007 |
| 23470964 | Molecular pathways: Inhibiting steroid biosynthesis in prostate cancer                                                                                                                                        | 2013 |
| 16755106 | New development in intracrinology of breast carcinoma                                                                                                                                                         | 2006 |
| 28368480 | Genetic and Histopathologic Intertumor Heterogeneity in Primary Aldosteronism                                                                                                                                 | 2017 |
| 19130396 | Expression of enzymes involved in synthesis and metabolism of estradiol in human breast as studied by immunocytochemistry and in situ hybridization                                                           | 2009 |
| 14623518 | Breast cancer tissue estrogens and their manipulation with aromatase inhibitors and inactivators                                                                                                              | 2003 |
| 18690485 | Differential regulation of dehydroepiandrosterone and estrogen on bone and uterus in ovariectomized mice                                                                                                      | 2009 |

|          |                                                                                                                                                                                      |      |
|----------|--------------------------------------------------------------------------------------------------------------------------------------------------------------------------------------|------|
| 21740958 | The role of estrogen-metabolizing enzymes and estrogen receptors in human epidermis                                                                                                  | 2011 |
| 17548088 | In vitro effect of dehydroepiandrosterone sulfate on steroid receptors, aromatase, cyclooxygenase-2 expression, and steroid hormone production in preovulatory human granulosa cells | 2007 |
| 23848148 | Changes in levels of gene expression in human aortal intima during atherogenesis                                                                                                     | 2013 |
| 34107159 | Effects of Lemborexant on the Pharmacokinetics of Oral Contraceptives: Results From a Phase 1 Drug-Drug Interaction Study in Healthy Females                                         | 2021 |
| 31536780 | Evaluating the effects on steroidogenesis of estragole and trans-anethole in a feto-placental co-culture model                                                                       | 2019 |
| 18725155 | CYP11A1 and CYP17 promoter polymorphisms associate with hyperandrogenemia in polycystic ovary syndrome                                                                               | 2009 |
| 22369716 | Breast cancer therapy based on melatonin                                                                                                                                             | 2012 |
| 15748827 | Effect of nomegestrol acetate on estrogen biosynthesis and transformation in MCF-7 and T47-D breast cancer cells                                                                     | 2005 |
| 35713964 | Ziritaxestat Drug-Drug Interaction with Oral Contraceptives: Role of SULT1E1 Inhibition                                                                                              | 2022 |
| 16530336 | Androgen excess in women--a health hazard?                                                                                                                                           | 2006 |
| 11306177 | Temporal and spatial distribution of corticosteroidogenic enzymes immunoreactivity in developing human adrenal                                                                       | 2001 |
| 12563679 | Serum levels of pregnenolone and 17-hydroxypregnenolone in patients with rheumatoid arthritis and systemic lupus erythematosus: relation to other adrenal hormones                   | 2003 |
| 18663016 | Excess estrogen sulfoconjugation as the possible cause for a poor sign of parturition in pregnant cows carrying somatic cell clone fetuses                                           | 2008 |
| 36413950 | Reconstitution of human adrenocortical specification and steroidogenesis using induced pluripotent stem cells                                                                        | 2022 |
| 25336526 | Wt1 dictates the fate of fetal and adult Leydig cells during development in the mouse testis                                                                                         | 2014 |
| 20505544 | Effect of hormone metabolism genotypes on steroid hormone levels and menopausal symptoms in a prospective population-based cohort of women experiencing the menopausal transition    | 2010 |
| 16303840 | Estrogen-metabolizing enzymes in breast cancers from women over the age of 80 years                                                                                                  | 2006 |
| 16293666 | Dehydroepiandrosterone sulfate is neuroprotective when administered either before or after injury in a focal cortical cold lesion model                                              | 2006 |
| 34944390 | Altered Steroidome in Women with Gestational Diabetes Mellitus: Focus on Neuroactive and Immunomodulatory Steroids from the 24th Week of Pregnancy to Labor                          | 2021 |
| 18589890 | The prevalence of 21-hydroxylase deficiency in adrenal incidentalomas - hormonal and mutation screening                                                                              | 2008 |
| 12959982 | GATA-6 is expressed in the human adrenal and regulates transcription of genes required for adrenal androgen biosynthesis                                                             | 2003 |
| 23900415 | Protein kinase C-induced activin A switches adrenocortical steroidogenesis to aldosterone by suppressing CYP17A1 expression                                                          | 2013 |

|          |                                                                                                                                                                           |      |
|----------|---------------------------------------------------------------------------------------------------------------------------------------------------------------------------|------|
| 19085698 | The frequency of CYP 21 gene mutations in Turkish women with hyperandrogenism                                                                                             | 2009 |
| 18505907 | The synergistic effect of sex hormone-binding globulin and aromatase genes on polycystic ovary syndrome phenotype                                                         | 2008 |
| 19308726 | Expression of estrogenicity genes in a lineage cell culture model of human breast cancer progression                                                                      | 2010 |
| 33441255 | Estrogens and development of the rete testis, efferent ductules, epididymis and vas deferens                                                                              | 2022 |
| 25817828 | Local estrogen metabolism in epithelial ovarian cancer suggests novel targets for therapy                                                                                 | 2015 |
| 10067824 | Regulation of estrogen sulfotransferase expression in Leydig cells by cyclic adenosine 3',5'-monophosphate and androgen                                                   | 1999 |
| 14523365 | Evaluation of the pituitary-adrenal axis in hyperandrogenic women with polycystic ovary syndrome                                                                          | 2003 |
| 15705377 | Prevalence of CYP21 mutations and IRS1 variant among women with polycystic ovary syndrome and adrenal androgen excess                                                     | 2005 |
| 36605939 | Role of aerobic exercise in ameliorating NASH: Insights into the hepatic thyroid hormone signaling and circulating thyroid hormones                                       | 2022 |
| 34094659 | Gene polymorphism-related differences in the outcomes of abiraterone for prostate cancer: a systematic overview                                                           | 2021 |
| 18774939 | Comparative contents of mRNAs of sex steroid receptors and enzymes of their metabolism in arterial walls of men                                                           | 2008 |
| 29684161 | Impact of heat stress during the follicular phase on porcine ovarian steroidogenic and phosphatidylinositol-3 signaling                                                   | 2018 |
| 19962254 | Breast cancer and steroid metabolizing enzymes: the role of progestogens                                                                                                  | 2009 |
| 35059953 | Estrogen Sulfotransferase is Highly Expressed in Vascular Endothelial Cells Overlying Atherosclerotic Plaques                                                             | 2022 |
| 37484942 | Dexamethasone affects human fetal adrenal steroidogenesis and subsequent ACTH response in an ex vivo culture model                                                        | 2023 |
| 29429410 | The human fetal adrenal produces cortisol but no detectable aldosterone throughout the second trimester                                                                   | 2018 |
| 18089598 | Expression of aromatase and estrogen sulfotransferase in eutopic and ectopic endometrium: evidence for unbalanced estradiol production in endometriosis                   | 2007 |
| 17661084 | Expression of aromatase and estrogen sulfotransferase in preinvasive and invasive breast cancer                                                                           | 2008 |
| 35442744 | The developmental origin and the specification of the adrenal cortex in humans and cynomolgus monkeys                                                                     | 2022 |
| 11155097 | Developmental changes in steroidogenic enzymes in human postnatal adrenal cortex: immunohistochemical studies                                                             | 2000 |
| 20178799 | Mice lacking Mrp1 have reduced testicular steroid hormone levels and alterations in steroid biosynthetic enzymes                                                          | 2010 |
| 36976310 | Effect of Dexamethasone on Abiraterone Pharmacokinetics in Mice: Determined by LC/MS Analysis                                                                             | 2023 |
| 25875613 | Human induced hepatic lineage-oriented stem cells: autonomous specification of human iPS cells toward hepatocyte-like cells without any exogenous differentiation factors | 2015 |

|          |                                                                                                                                                        |      |
|----------|--------------------------------------------------------------------------------------------------------------------------------------------------------|------|
| 19250194 | New developments in intracrinology of human breast cancer: estrogen sulfatase and sulfotransferase                                                     | 2009 |
| 35982918 | An approach to uncover the relationship between 17 $\beta$ -estradiol and ESR1/ESR2 ratio in the regulation of canine corpus luteum                    | 2022 |
| 27809697 | Determination of 17OHPreg and DHEAS by LC-MS/MS: Impact of Age, Sex, Pubertal Stage, and BMI on the $\Delta$ 5 Steroid Pathway                         | 2017 |
| 27531568 | Role of steroid sulfatase in steroid homeostasis and characterization of the sulfated steroid pathway: Evidence from steroid sulfatase deficiency      | 2016 |
| 9539798  | Dehydroepiandrosterone: a potential signalling molecule for neocortical organization during development                                                | 1998 |
| 15355916 | Steroid sulfatase and estrogen sulfotransferase in human endometrial carcinoma                                                                         | 2004 |
| 33911053 | Suppressed estrogen supply via extra-ovarian progesterone receptor membrane component 1 in menopause                                                   | 2021 |
| 33064293 | Impact of Human SULT1E1 Polymorphisms on the Sulfation of 17 $\beta$ -Estradiol, 4-Hydroxytamoxifen and Diethylstilbestrol by SULT1E1 Allozymes        | 2022 |
| 18467089 | In situ estrogen metabolism in proliferative endometria from untreated women with polycystic ovarian syndrome with and without endometrial hyperplasia | 2008 |
| 36473578 | Novel insights into bile acid detoxification via CYP, UGT and SULT enzymes                                                                             | 2023 |
| 15878968 | Transcriptional regulation of dehydroepiandrosterone sulfotransferase (SULT2A1) by estrogen-related receptor alpha                                     | 2005 |
| 34926449 | Arbutin Alleviates the Liver Injury of $\alpha$ -Naphthylisothiocyanate-induced Cholestasis Through Farnesoid X Receptor Activation                    | 2021 |
| 15482786 | Role of a CYP17 polymorphism in the regulation of circulating dehydroepiandrosterone sulfate levels in women with polycystic ovary syndrome            | 2004 |
| 26047979 | Preliminary study of FMO1, FMO5, CYP21, ESR1, PLIN2 and SULT2A1 as candidate gene for compounds related to boar taint                                  | 2015 |
| 17466517 | Steroid pathway and oestrone sulphate production in canine inflammatory mammary carcinoma                                                              | 2007 |
| 31169883 | Genetic Association Study of Eight Steroid Hormones and Implications for Sexual Dimorphism of Coronary Artery Disease                                  | 2019 |
| 21084398 | Clinical, biochemical, and molecular characterization of macronodular adrenocortical hyperplasia of the zona reticularis: a new syndrome               | 2011 |
| 31425786 | Essential oils disrupt steroidogenesis in a feto-placental co-culture model                                                                            | 2019 |
| 25767055 | Dienogest reduces HSD17 $\beta$ 1 expression and activity in endometriosis                                                                             | 2015 |
| 19141651 | Steroid sulfatase and estrogen sulfotransferase in colon carcinoma: regulators of intratumoral estrogen concentrations and potent prognostic factors   | 2009 |
| 23476785 | The sulfatase pathway for estrogen formation: targets for the treatment and diagnosis of hormone-associated tumors                                     | 2013 |



|          |                                                                                                                                                                                                          |      |
|----------|----------------------------------------------------------------------------------------------------------------------------------------------------------------------------------------------------------|------|
| 33748934 | Pharmacokinetic and Pharmacodynamic Profiles of Ethinylestradiol/Norgestimate Combination or Norethindrone upon Coadministration with Elagolix 150 mg Once Daily in Healthy Premenopausal Women          | 2021 |
| 16014403 | Corticotropin-releasing hormone (CRH) and urocortin act through type 1 CRH receptors to stimulate dehydroepiandrosterone sulfate production in human fetal adrenal cells                                 | 2005 |
| 26888303 | n-butylparaben induces male reproductive disorders via regulation of estradiol and estrogen receptors                                                                                                    | 2016 |
| 19567527 | Adrenal function during childhood and puberty in daughters of women with polycystic ovary syndrome                                                                                                       | 2009 |
| 37110661 | Hepatotoxic Components Effect of Chebulae Fructus and Associated Molecular Mechanism by Integrated Transcriptome and Molecular Docking                                                                   | 2023 |
| 16168635 | Treatment with high-dose estrogen (diethylstilbestrol) significantly decreases plasma estrogen and androgen levels but does not influence in vivo aromatization in postmenopausal breast cancer patients | 2005 |
| 37949197 | Diuron-induced fetal Leydig cell dysfunction in in vitro organ cultured fetal testes                                                                                                                     | 2023 |
| 9870265  | C19 steroids estrogenic activity in human breast cancer cell lines: importance of dehydroepiandrosterone sulfate at physiological plasma concentration                                                   | 1998 |
| 33340681 | Steroid metabolome profiling of follicular fluid in normo- and hyperandrogenic women with polycystic ovary syndrome                                                                                      | 2021 |
| 37268990 | Dehydroepiandrosterone supplementation and the impact of follicular fluid metabolome and cytokinome profiles in poor ovarian responders                                                                  | 2023 |
| 34107842 | SULT genetic polymorphisms: physiological, pharmacological and clinical implications                                                                                                                     | 2021 |
| 29467139 | SULFATION PATHWAYS: Formation and hydrolysis of sulfonated estrogens in the porcine testis and epididymis                                                                                                | 2018 |
| 17408424 | Benign cortisol-secreting adrenocortical adenomas produce small amounts of androgens                                                                                                                     | 2007 |
| 19022235 | Expression of 17 $\beta$ -hydroxysteroid dehydrogenases and other estrogen-metabolizing enzymes in different cancer cell lines                                                                           | 2009 |
| 37110661 | Hepatotoxic Components Effect of Chebulae Fructus and Associated Molecular Mechanism by Integrated Transcriptome and Molecular Docking                                                                   | 2023 |
| 37953901 | In Situ Spatial Reconstruction of Distinct Normal and Pathological Cell Populations Within the Human Adrenal Gland                                                                                       | 2023 |
| 33753083 | An in vitro investigation of endocrine disrupting potentials of ten bisphenol analogues                                                                                                                  | 2021 |
| 33002589 | Intratumoral heterogeneity of the tumor cells based on in situ cortisol excess in cortisol-producing adenomas; ~An association among morphometry, genotype and cellular senescence~                      | 2020 |
| 27923582 | High mRNA levels of 17 $\beta$ -hydroxysteroid dehydrogenase type 1 correlate with poor prognosis in endometrial cancer                                                                                  | 2017 |
| 22422661 | Acute effect of high-dose isoflavones from Pueraria lobata (Willd.) Ohwi on lipid and bone metabolism in ovariectomized mice                                                                             | 2012 |

|          |                                                                                                                                                     |      |
|----------|-----------------------------------------------------------------------------------------------------------------------------------------------------|------|
| 37881184 | The zhuyu pill relieves rat cholestasis by regulating the mRNA expression of lipid and bile metabolism associated genes                             | 2023 |
| 33865853 | Elucidation of metabolic pathways of 25-hydroxyvitamin D3 mediated by CYP24A1 and CYP3A using Cyp24a1 knockout rats generated by CRISPR/Cas9 system | 2021 |
| 35806403 | Per1/Per2 Disruption Reduces Testosterone Synthesis and Impairs Fertility in Elderly Male Mice                                                      | 2022 |

Table S2. A spectrum of potential partner proteins of SULT1E1 isolated from rat liver lysate.

| Peptides | Unique peptides | Sequence coverage [%] | Mol. weight [kDa] | Score  | Intensity | MS/MS count | Uniprot ID | Peptide sequences                                                                 | Protein name                                                                                                          |
|----------|-----------------|-----------------------|-------------------|--------|-----------|-------------|------------|-----------------------------------------------------------------------------------|-----------------------------------------------------------------------------------------------------------------------|
| 1        | 1               | 4.1                   | 37.331            | 33.957 | 4835200   | 1           | P54313     | SELEQLRQEAEQLR                                                                    | Guanine nucleotide-binding protein G(I)/G(S)/G(T) subunit beta-2<br>Guanine nucleotide-binding protein subunit beta-4 |
| 2        | 2               | 23.9                  | 15.355            | 20.545 | 28254000  | 2           | P00173     | AEQSDKDVKYYTLEEIQK<br>TYIIGELHPDDRSK                                              | Cytochrome b5 OS=Rattus norvegicus                                                                                    |
| 1        | 1               | 5.5                   | 39.618            | 13.263 | 10271000  | 2           | P00884     | ISDQCPSSLAIQENANALAR                                                              | Fructose-bisphosphate aldolase B                                                                                      |
| 2        | 2               | 4.9                   | 46.496            | 63.334 | 136930000 | 4           | P09034     | TQDPAKAPNTPDVLEIEFK<br>TQDPAKAPNTPDVLEIEFKK                                       | Argininosuccinate synthase                                                                                            |
| 1        | 1               | 6.8                   | 23.504            | 6.4743 | 2695200   | 1           | P09527     | EAINVEQAFQTIAR                                                                    | Ras-related protein Rab-7a                                                                                            |
| 1        | 1               | 2.2                   | 57.076            | 6.0321 | 3769800   | 1           | P12939     | FGDIAPLNLPR                                                                       | Cytochrome P450 2D10<br>Cytochrome P450 2D1                                                                           |
| 4        | 4               | 16.2                  | 33.906            | 40.594 | 171400000 | 5           | P17988     | CPGVPSGLETLEETPAPR<br>EFSRPPLVHVK<br>MEFSRPPLVHVK<br>SLPEETVDSIVHHTSFK            | Sulfotransferase 1A1                                                                                                  |
| 2        | 2               | 8.7                   | 38.201            | 70.811 | 35961000  | 2           | P29147     | TIQLNVCNSEEVEKAVETVR<br>VVNISSMLGR                                                | D-beta-hydroxybutyrate dehydrogenase. mitochondrial                                                                   |
| 1        | 1               | 1.2                   | 85.338            | 5.9824 | 8107600   | 1           | P30835     | ATVDLEKLR                                                                         | ATP-dependent 6-phosphofructokinase. liver type                                                                       |
| 1        | 1               | 1.9                   | 54.081            | 6.1273 | 7729200   | 1           | P30839     | MERQVQRLR                                                                         | Aldehyde dehydrogenase family 3 member A2                                                                             |
| 4        | 4               | 18.8                  | 35.764            | 107.72 | 357530000 | 12          | P50237     | AGTTWTQEIVDMIQNDGDVQKCQR<br>KMAGSNITFRTEI<br>MAGSNITFRTEI<br>SLEKMKDLHLGEQDLQPETR | Sulfotransferase 1C1                                                                                                  |

|   |   |      |        |        |           |   |        |                                                                         |                                               |
|---|---|------|--------|--------|-----------|---|--------|-------------------------------------------------------------------------|-----------------------------------------------|
| 4 | 4 | 13.7 | 34.835 | 67.922 | 184560000 | 6 | P52847 | GTAEDVFRK<br>GTAEDVFRKDLK<br>IANFLDKTLDEHTLER<br>SGVELLKKTSPR           | Sulfotransferase 1B1                          |
| 4 | 4 | 3.2  | 101.44 | 47.038 | 70458000  | 4 | Q64380 | AAVARGAQVIENCAVTGIR<br>GAQVIENCAVTGIR<br>GAQVIENCAVTGIRVR<br>VRTDDFGVRR | Sarcosine dehydrogenase.<br>mitochondrial     |
| 2 | 2 | 3.7  | 34.859 | 254.32 | 430230000 | 3 | Q9WUW9 | ALAPELSR<br>ALAPELSRQTK                                                 | Sulfotransferase 1C2A<br>Sulfotransferase 1C2 |

Table S3. A list of amino acid residues (a.a.r.) in the protein interfaces of SULT1E1 complexes with CYP17A1 and CYB5A (models).

| dimeric SULT1E1/CYP17A1                                                                                                        |                                                                                                                        |                                                                                                                                                                                         |                                                                                                                                                                                                                                                                        |
|--------------------------------------------------------------------------------------------------------------------------------|------------------------------------------------------------------------------------------------------------------------|-----------------------------------------------------------------------------------------------------------------------------------------------------------------------------------------|------------------------------------------------------------------------------------------------------------------------------------------------------------------------------------------------------------------------------------------------------------------------|
| SULT1E1(chain A):CYP17A1<br>(interface1)                                                                                       |                                                                                                                        | SULT1E1(chain B):CYP17A1<br>(interface2)                                                                                                                                                |                                                                                                                                                                                                                                                                        |
| SULT1E1(chain A)                                                                                                               | CYP17A1                                                                                                                | SULT1E1(chain B)                                                                                                                                                                        | CYP17A1                                                                                                                                                                                                                                                                |
| ALA146, LYS232, THR240, THR241, LEU242, PRO243, ASP244, GLU245, <b>ASN248</b> , <b>LYS250</b> , LEU251, SER252, PRO253         | LYS136, ASP137, GLY138, ASP139, GLN140, LYS141, <b>GLU143</b> , LYS144, THR343, ILE344, SER345, ASN348, ARG349, GLN450 | <b>MET1</b> , ASN2, SER3, GLU4, ASP6, TYR7, <b>GLU9</b> , LYS10, ALA146, ASN150, GLY152, SER153, <i>GLU156</i> , LYS160, ASP244, <b>GLU245</b> , <b>ASN248</b> , <b>LYS250</b> , LEU251 | PRO62, <b>HIS78</b> , HIS79, <i>GLN80</i> , LEU81, LYS83, GLU84, LYS88, GLN323, LYS327, ASN402, LYS404, GLU405, <b>HIS407</b> , GLN408, PHE412, MET413, <b>GLU415</b> , ARG416, LEU418, <i>ASN419</i> , PRO420, ALA421, THR423, GLN424, ILE426, SER427, PRO428, VAL430 |
| dimeric SULT1E1/CYB5A                                                                                                          |                                                                                                                        |                                                                                                                                                                                         |                                                                                                                                                                                                                                                                        |
| SULT1E1(chain A):CYB5A<br>(interface1)                                                                                         |                                                                                                                        | SULT1E1(chainB):CYB5A<br>(interface2)                                                                                                                                                   |                                                                                                                                                                                                                                                                        |
| SULT1E1(chain A)                                                                                                               | CYB5A                                                                                                                  | SULT1E1(chain B)                                                                                                                                                                        | CYB5A                                                                                                                                                                                                                                                                  |
| TYR139, TYR140, LEU143, <b>ASN150</b> , GLY152, SER153, PHE154, ASP244, GLU245, <b>ASN248</b> , <b>LYS250</b> , LEU251, SER252 | HIS31, ASP58, THR60, GLU61, <i>GLU64</i> , ASP65, VAL66, GLY67, LEU92, <i>ASN93</i> , LYS94, PRO95                     | MET1, SER3, ASP6, TYR139, LEU143, ALA146, <b>ASN150</b> , GLY152, SER153, <i>GLU156</i> , ASN248, LYS250, LEU251                                                                        | SER23, PHE40, GLU42, GLU43, HIS44, PRO45, GLY46, GLY47, GLU48, <i>GLU49</i> , VAL50, ARG52, MET75, ILE103                                                                                                                                                              |
| monomeric SULT1E1/CYP17A1                                                                                                      |                                                                                                                        |                                                                                                                                                                                         |                                                                                                                                                                                                                                                                        |

| SULT1E1                                                                                                                                                                                                                                                                                   | CYP17A1                                                                                                                                                                                                                                                                                                                           |
|-------------------------------------------------------------------------------------------------------------------------------------------------------------------------------------------------------------------------------------------------------------------------------------------|-----------------------------------------------------------------------------------------------------------------------------------------------------------------------------------------------------------------------------------------------------------------------------------------------------------------------------------|
| MET1, SER3, <b><i>GLU4</i></b> , ASP6, TYR139, <i>TYR140</i> , LEU143, ASN150, GLY152, SER153, PHE154, PRO155, GLU156, LYS232, LYS250, LEU251, SER252, PRO253, ARG256, <b><i>LYS257</i></b> , ILE259, LYS264, ASN265, HIS266, THR268, VAL269, ALA270, GLU273, LYS274, GLU293              | LYS83, ILE87, <b><i>LYS91</i></b> , GLN122, ARG125, ARG126, MET129, ALA130, ALA133, LEU134, <i>LYS136</i> , ASP137, GLY138, <b><i>ASP139</i></b> , ASP257, PRO280, ASP281, ILE344, ARG347, ASN348, ARG358, GLN424, ILE426, SER427, SER429, VAL430, TYR432, LEU433, ALA437, GLY438, PRO439, SER441, GLU445, ILE446, ARG449, GLN450 |
| monomeric SULT1E1/CYB5A                                                                                                                                                                                                                                                                   |                                                                                                                                                                                                                                                                                                                                   |
| SULT1E1                                                                                                                                                                                                                                                                                   | CYB5A                                                                                                                                                                                                                                                                                                                             |
| LEU143, ASN150, GLY152, SER153, PHE154, PRO155, GLU156, PHE228, GLN229, <b><i>LYS232</i></b> , GLN249, <b><i>LYS250</i></b> , <i>LEU251</i> , SER252, PRO253, <b><i>ARG256</i></b> , <b><i>LYS257</i></b> , ILE259, LYS264, ASN265, <b><i>HIS266</i></b> , PHE267, THR268, VAL269, ALA270 | GLY46, GLY47, <b><i>GLU49</i></b> , VAL50, ARG52, <b><i>GLU53</i></b> , GLN54, GLU61, ASN62, <i>ASP65</i> , VAL66, PRO95, PRO96, GLU97, THR98, LEU99, ILE100, THR101, <i>THR102</i> , ILE103, <b><i>ASP104</i></b> , SER105, SER107, TRP110, THR111, ILE115                                                                       |

a.a.r., forming salt bridges and H-bonds, are highlighted with bold and italic types, respectively. a.a.r., whose involvement in the formation of hydrogen or electrostatic bonds is typical for most of the models predicted, are highlighted with green color.

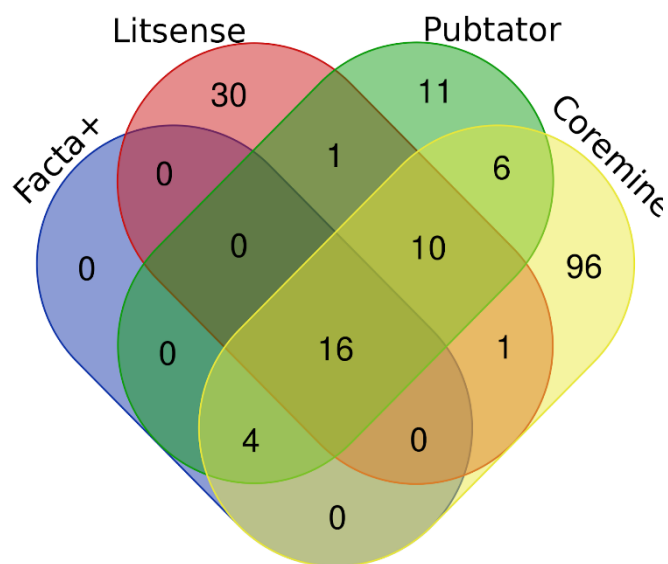

Figure S1. Venn diagrams showing number of articles found using four different text mining web-based tools.





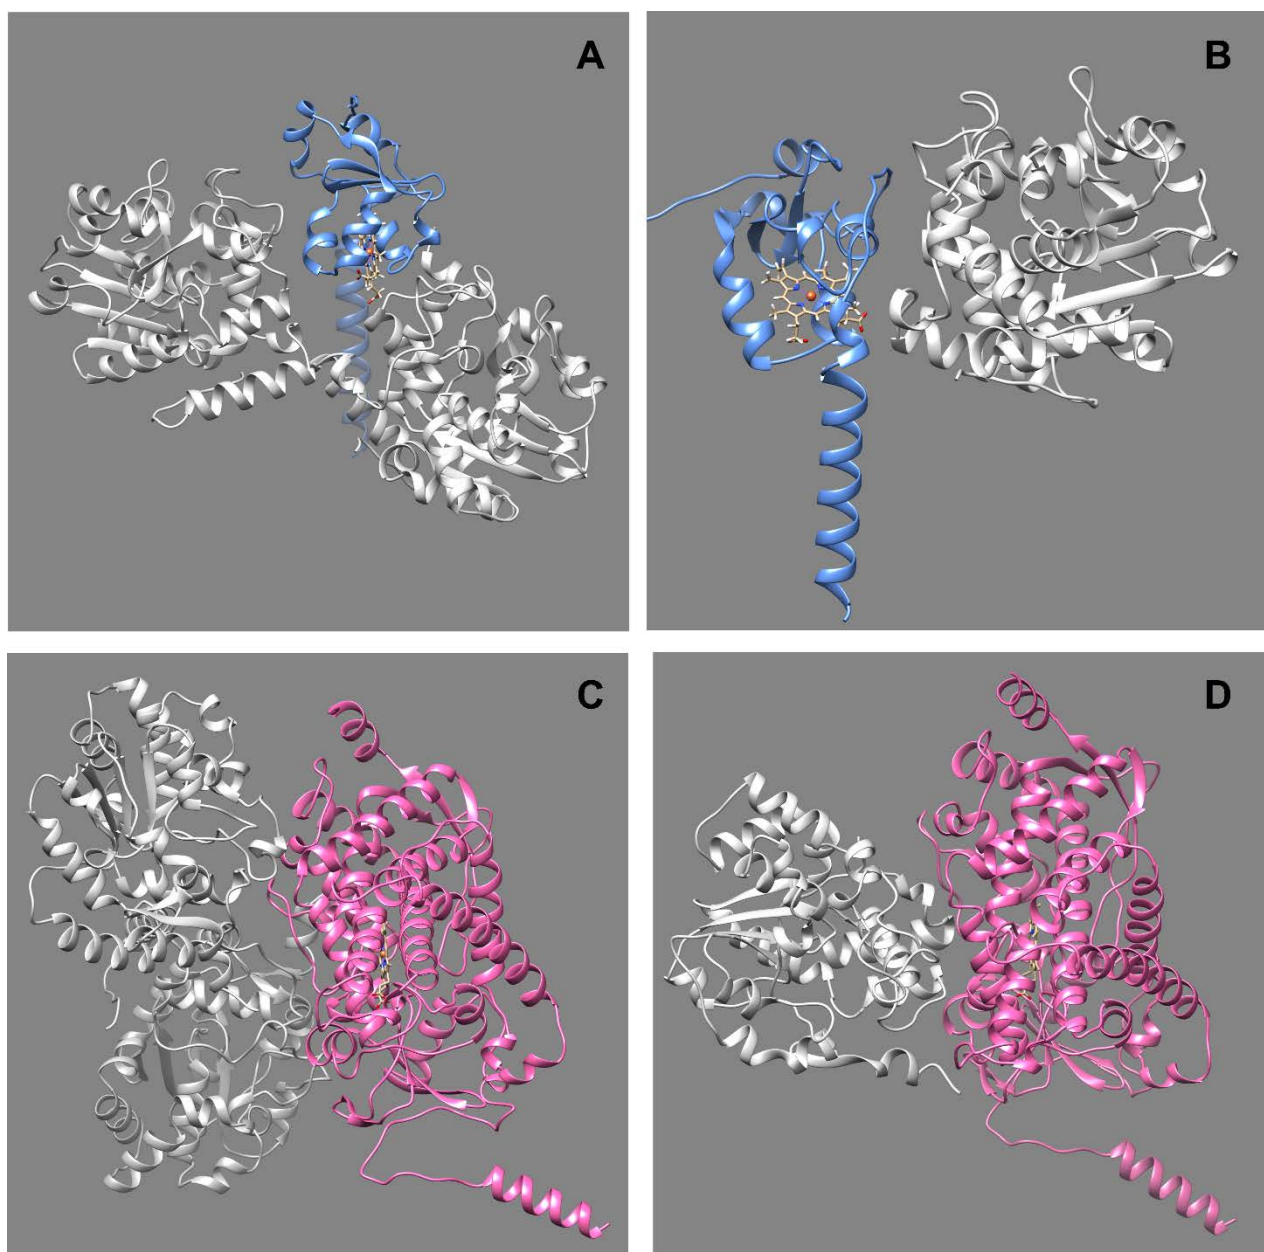

Figure S3. Models of dimeric (A, C) and monomeric (B, D) SULT1E1 with CYB5A (A, B) and CYP17A1 (C, D) predicted in the AlphaFold 2 software.

**A****CYP17A1**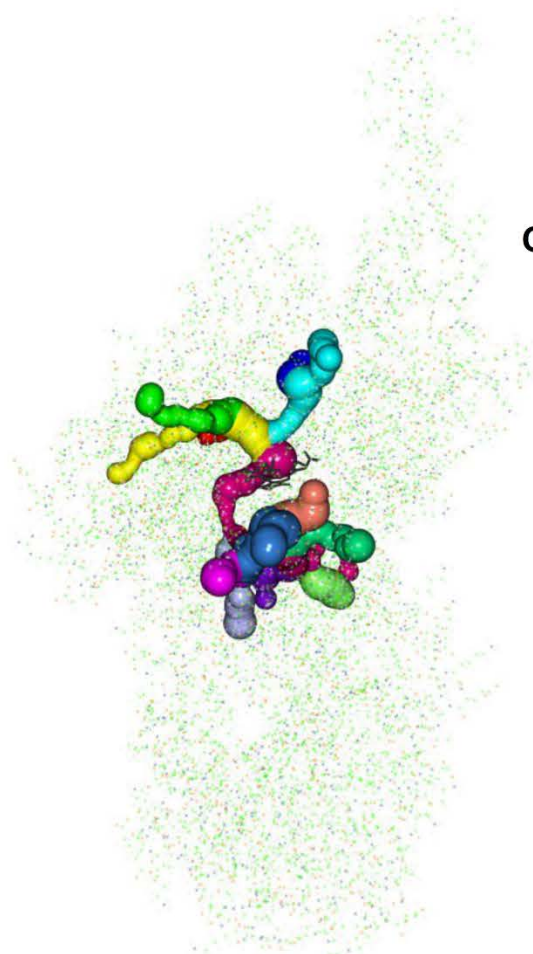**SULT1E1 monomer****B****CYP17A1**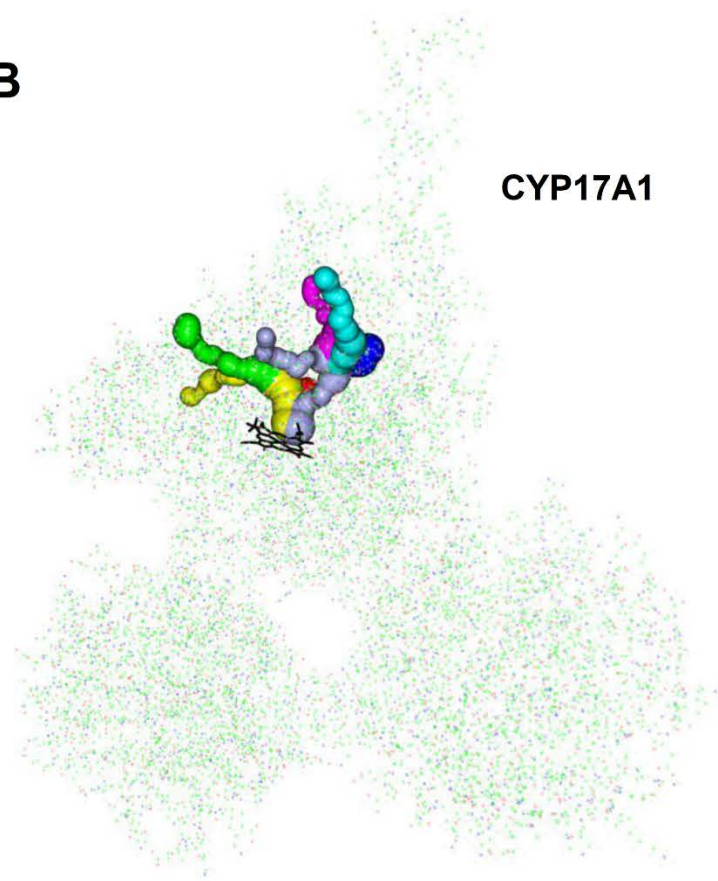**SULT1E1 dimer**

Figure S4. A set of calculated channels in CYP17A1 in complexes with the monomer (A) and dimer (B) forms of SULT1E1. The channels are colored according to the entry point on the surface of CYP17A1. It is possible to overlay different colors on top of each other in case of merging channels together.

|    |            |       |                                                       |     |
|----|------------|-------|-------------------------------------------------------|-----|
| A. | CYP17A1    | (1)   | 1                                                     | 50  |
|    | CYP17A1_tr | (1)   | -----MAKKT                                            |     |
|    |            |       | 51                                                    | 100 |
|    | CYP17A1    | (51)  | NNFFKLQKKYGPISVRMGTKTTVIIVGHHQLAKEVLIRKGRDPSGRPQMA    |     |
|    | CYP17A1_tr | (29)  | NNFFKLQKKYGPISVRMGTKTTVIIVGHHQLAKEVLIRKGRDPSGRPQMA    |     |
|    |            |       | 101                                                   | 150 |
|    | CYP17A1    | (101) | TLDIASNNRRGIAFADSGAHWQLHRRRLAMATFALFKDGDQKLEKIICQEI   |     |
|    | CYP17A1_tr | (79)  | TLDIASNNRRGIAFADSGAHWQLHRRRLAMATFALFKDGDQKLEKIICQEI   |     |
|    |            |       | 151                                                   | 200 |
|    | CYP17A1    | (151) | STLCDMLATHNGQSIDISFPVFVAVTNVISLICFNTSYRNGDPELNVIQN    |     |
|    | CYP17A1_tr | (129) | STLCDMLATHNGQSIDISFPVFVAVTNVISLICFNTSYRNGDPELNVIQN    |     |
|    |            |       | 201                                                   | 250 |
|    | CYP17A1    | (201) | YNEGIIDNLSKDSLVDLVFWLRIFFPNKTLERLKS HVKIRNDLLNKILENY  |     |
|    | CYP17A1_tr | (179) | YNEGIIDNLSKDSLVDLVFWLRIFFPNKTLERLKS HVKIRNDLLNKILENY  |     |
|    |            |       | 251                                                   | 300 |
|    | CYP17A1    | (251) | KEKFRSDSITNMLDTLMQAFQNSDNGNAGFDQDSSELLSDNHILTITGDIF   |     |
|    | CYP17A1_tr | (229) | KEKFRSDSITNMLDTLMQAFQNSDNGNAGFDQDSSELLSDNHILTITGDIF   |     |
|    |            |       | 301                                                   | 350 |
|    | CYP17A1    | (301) | GAGVETTTSVVKWTLAFLHNPQVKKRLYEEIDQNVGFSRTPTISDRNRL     |     |
|    | CYP17A1_tr | (279) | GAGVETTTSVVKWTLAFLHNPQVKKRLYEEIDQNVGFSRTPTISDRNRL     |     |
| B. |            |       | 351                                                   | 400 |
|    | CYP17A1    | (351) | LLLEATIREVLRRLRPVAPMLIPHKANVDSSIGFAVDKGTETVIINLWALH   |     |
|    | CYP17A1_tr | (329) | LLLEATIREVLRRLRPVAPMLIPHKANVDSSIGFAVDKGTETVIINLWALH   |     |
|    |            |       | 401                                                   | 450 |
|    | CYP17A1    | (401) | HNEKEWHQPDQFMFERFLNPAGTQLISPSVSYLPFGAGPRSCIGEILARQ    |     |
|    | CYP17A1_tr | (379) | HNEKEWHQPDQFMFERFLNPAGTQLISPSVSYLPFGAGPRSCIGEILARQ    |     |
|    |            |       | 451                                                   | 500 |
|    | CYP17A1    | (451) | ELFLIMAWLLQRFDELVPDDGQLPSLEGIPKVVFLIDSFKVKIKVRQAWR    |     |
|    | CYP17A1_tr | (429) | ELFLIMAWLLQRFDELVPDDGQLPSLEGIPKVVFLIDSFKVKIKVRQAWR    |     |
|    |            |       | 501                                                   | 514 |
|    | CYP17A1    | (501) | EAQAEGSTHHHHHH                                        |     |
|    | CYP17A1_tr | (479) | EAQAEGSTHHHHHH                                        |     |
|    |            |       | 1                                                     | 50  |
|    | SULT1E1    | (1)   | HHHHHHMSELDYIEKFEEVHGILMYKDFVKYWDNVAFQARPDULVIAT      |     |
|    | SULT2A1    | (1)   | -----MSDDELWFEGLAFPTMGFRSETLRKVRDEEVIRDEEDVIILT       |     |
|    |            |       | 51                                                    | 100 |
|    | SULT1E1    | (51)  | YPKSGTIVVSEIYMIYKEGDVEKCKEDVIFNRIFFLECRKENLMNGVKQ     |     |
|    | SULT2A1    | (42)  | YPKSGTIVVLAELICIMHSKGDARWIQSVPIWERSSEWVES-----EIGYTA  |     |
|    |            |       | 101                                                   | 150 |
|    | SULT1E1    | (101) | LDENSPRIVKTHLPPELLSASFWEKDCKIYILCRNARDVAVSFYFFFLM     |     |
|    | SULT2A1    | (87)  | LSETESPRLFSHLPIQLFKSFPSSKAKVIYLMRNPRDVLVSGYFFWKN      |     |
|    |            |       | 151                                                   | 200 |
|    | SULT1E1    | (151) | VAGHPNFGSFPPEVEKFMQGOVPYGSWVKHVRSWWEGKSPRVFLFYEE      |     |
|    | SULT2A1    | (137) | MKFIKKPKSWEENFEWFCQGTULYGSWEDHGHGMPMREEKNFLLSYEE      |     |
|    |            |       | 201                                                   | 250 |
|    | SULT1E1    | (201) | LKEDIRREVIKLIHFLEKRPSEELVDRIHHHTSFQEMNNPSNYTTLPD      |     |
|    | SULT2A1    | (187) | LKQDTGRTIERCCFLGRTLEPEELNLILKNSSFSQSMKENKMSNYSLSV     |     |
|    |            |       | 251                                                   | 300 |
|    | SULT1E1    | (251) | EIMNQKLSPFMRKGITGDWRKNHFTVALNEKFDKHEEQMKESTLKFRTEI    |     |
|    | SULT2A1    | (237) | DYVVDNAQ-LLRKGVS GDWRKNHFTVAQAE DFDKLEQEKMAADLPRELFWE |     |
|    |            |       | 301                                                   |     |
|    | SULT1E1    | (301) | -----                                                 |     |
|    | SULT2A1    | (286) | HHHHHH                                                |     |

Figure S5. Comparison of amino acid sequences of the studied proteins using the Align software package (Invitrogen, USA). A. CYP17A1/ CYP17A1tr; B. SULT1E1/ SULT2A1.

 - the missing part of the trunked form of CYP17A1.

 - the homologous part of the amino acid sequence.

 - the identical part of the amino acid sequence.

 - artificially added 6xHis-tag, for subsequent purification of proteins by metal-affinity chromatography (Ni-NTA sorbent).

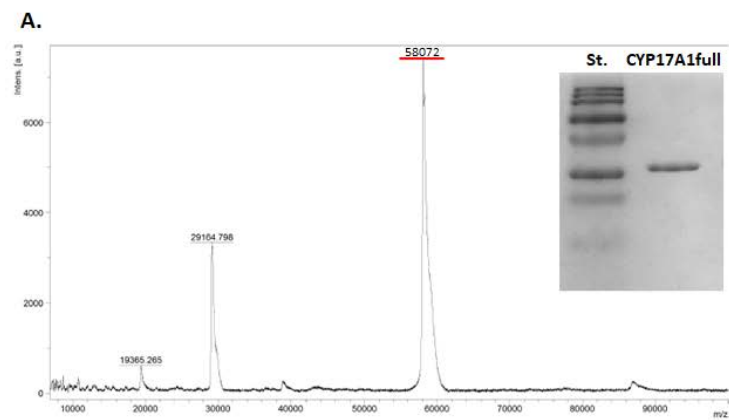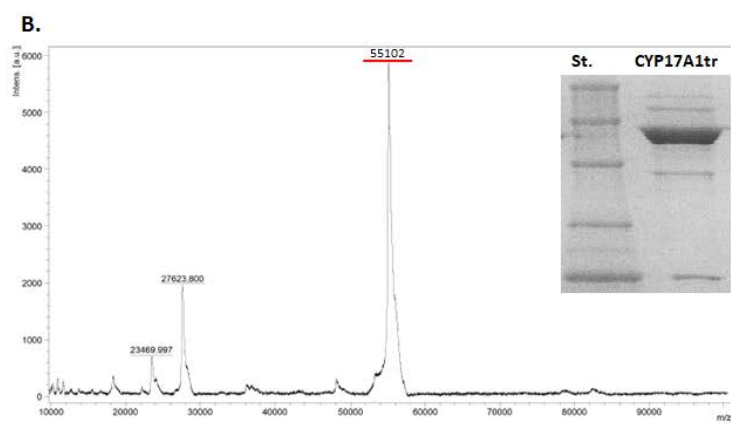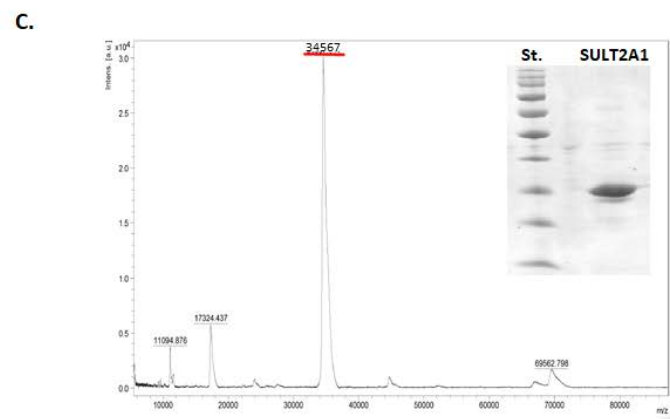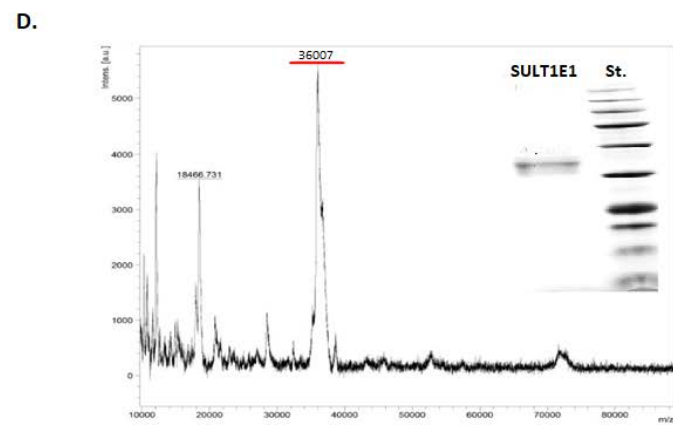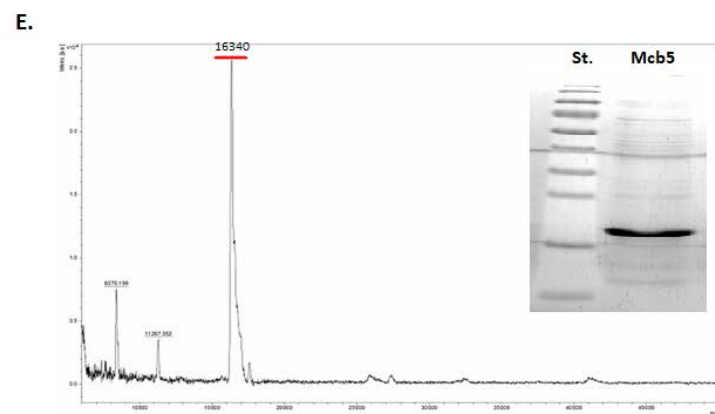

Figure S6. Protein purification data. A. Preparation of CYP17A1 full-length with a mass of 58.072 kDa (according to MALDI-TOF mass spectrometry). SDS-PAGE analysis of CYP17A1 full-length protein. St. - protein molecular weight standard (250-10 kDa, Thermo Scientific #26619). B. Preparation of CYP17A1tr with a mass of 55.102 kDa (according to MALDI-TOF mass spectrometry). SDS-PAGE analysis of CYP17A1 tr. protein. St. - protein molecular weight standard (250-10 kDa, Thermo Scientific #26619). C. Preparation of SULT2A1 with a mass of 34.567 kDa (according to MALDI-TOF mass spectrometry). SDS-PAGE analysis of SULT2A1 protein. St. - protein molecular weight standard (250-10kDa, NEB #P7719S). D. Preparation of SULT1E1 with a mass of 36.007 kDa (according to MALDI-TOF mass spectrometry). SDS-PAGE analysis of SULT1E1 protein. St. - protein molecular weight standard (245-11kDa, NEB #P7712S). E. Preparation of Mcb5 with a mass of 16.340 kDa (according to MALDI-TOF mass spectrometry). SDS-PAGE analysis of Mcb5 protein. St. - protein molecular weight standard (180-10kDa, Thermo Scientific #26616).
